# Supplementary material for: Polythiophene-g-poly(dimethylaminoethyl methacrylate) doped methyl cellulose hydrogel behaving like a polymeric AND logic gate
Source: Royal Society of Chemistry journal article supplement (doi:10.1039/c2sm25145k), 2012-01-01
Supplement: c2sm25145k.pdf [file c2sm25145k.pdf]

**Supplementary Information**

**Polythiophene-*g*-Poly(dimethylaminoethyl methacrylate) Doped Methyl  
Cellulose Hydrogel Behaving like a Polymeric AND Logic Gate**

**Sanjoy Samanta, Sandip Das, Rama K. Layek, Dhruva P. Chatterjee<sup>1</sup> and Arun K.  
Nandi\***

*Polymer Science Unit, Indian Association for the Cultivation of Science, Jadavpur,  
Kolkata 700032, India*

---

<sup>1</sup> *present address, Dept of Chemistry, Krishnanagar Government College, Nadia-741 101*

\*For correspondence: A. K. Nandi, E-mail: [psuakn@iacs.res.in](mailto:psuakn@iacs.res.in)

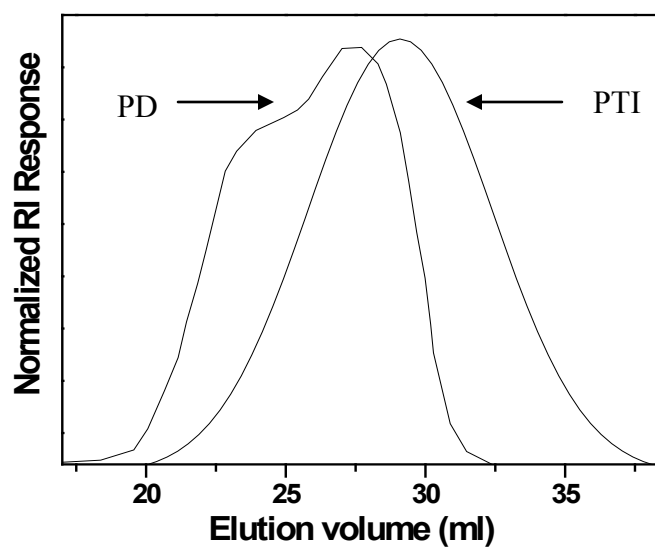

SI Fig. 1 GPC traces of PTI and PD polymers

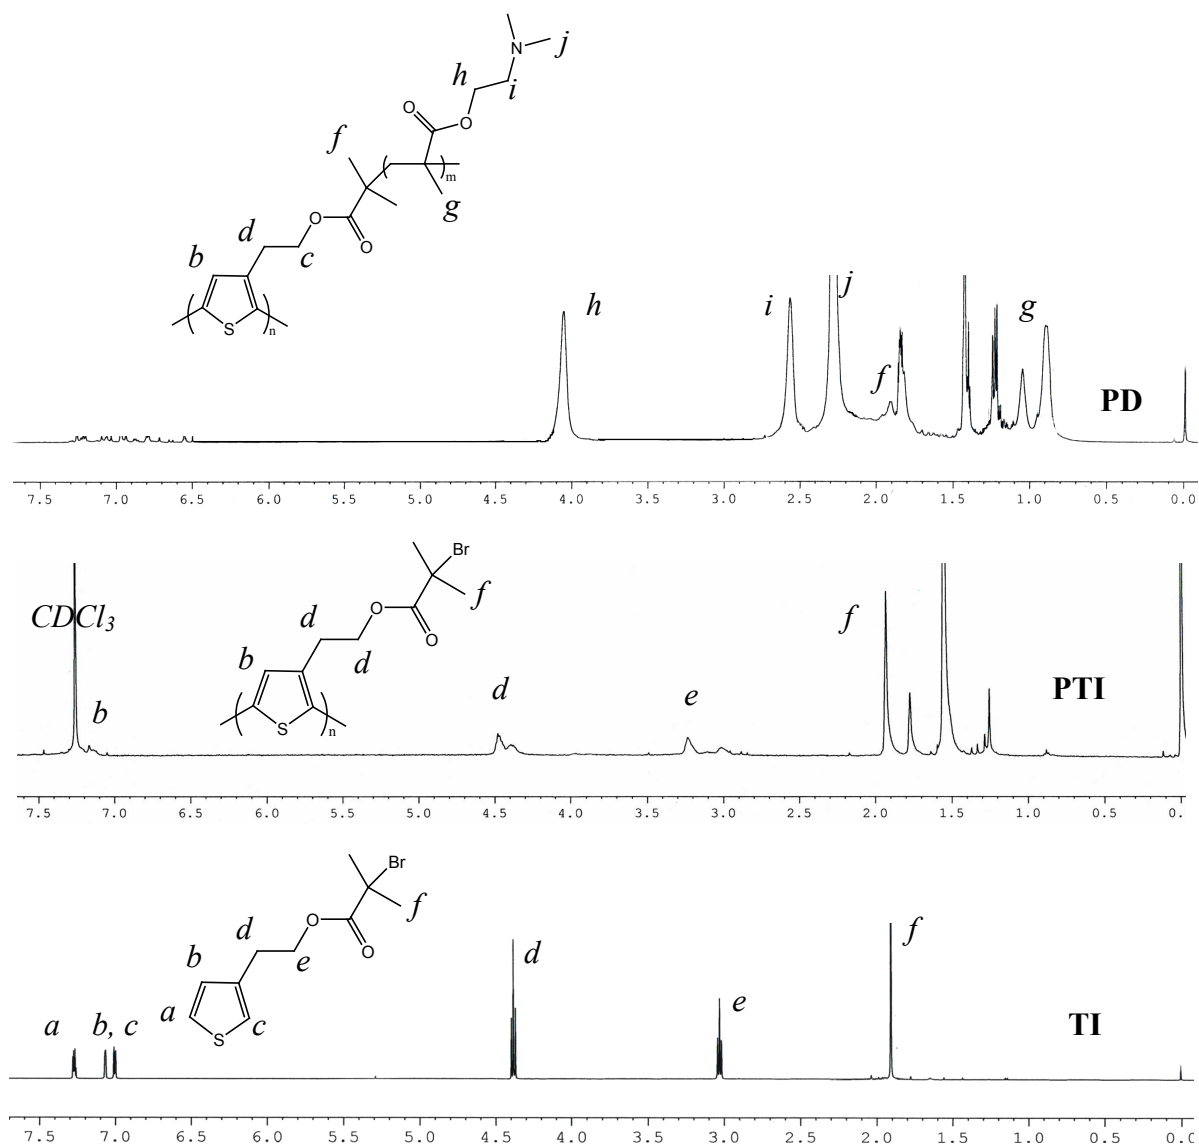

SI Fig. 2  $^1\text{H}$  NMR spectrum of TI, PTI and PD polymer in  $\text{CDCl}_3$

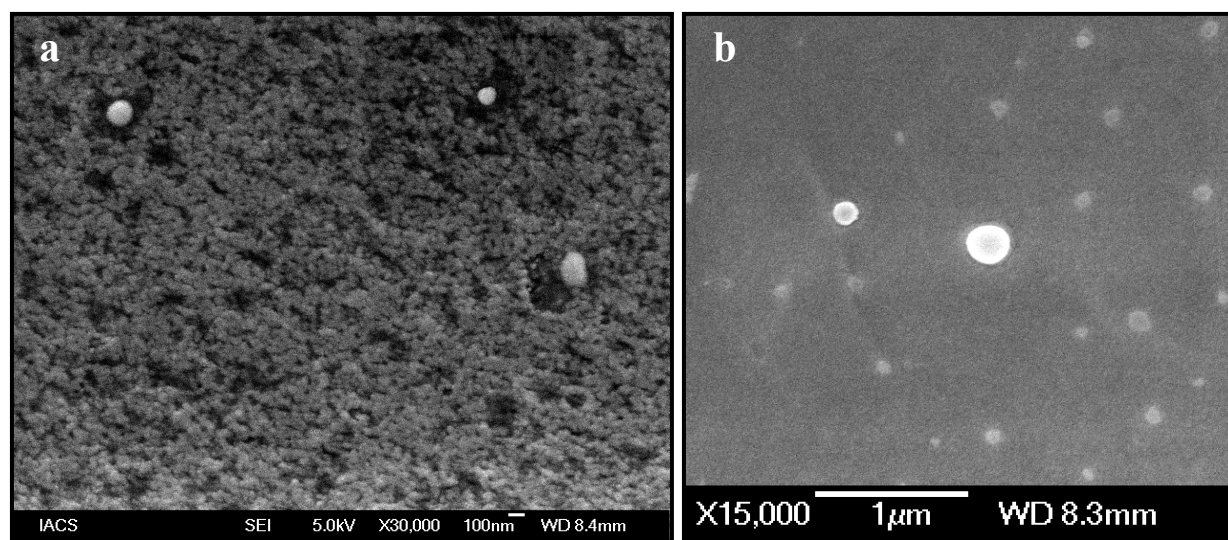

**SI Fig. 3** (a) FESEM images of dried hydrogel of MC (2%, w/v) and (b) and that of dried PD solution (0.1%, w/v) at pH 7.

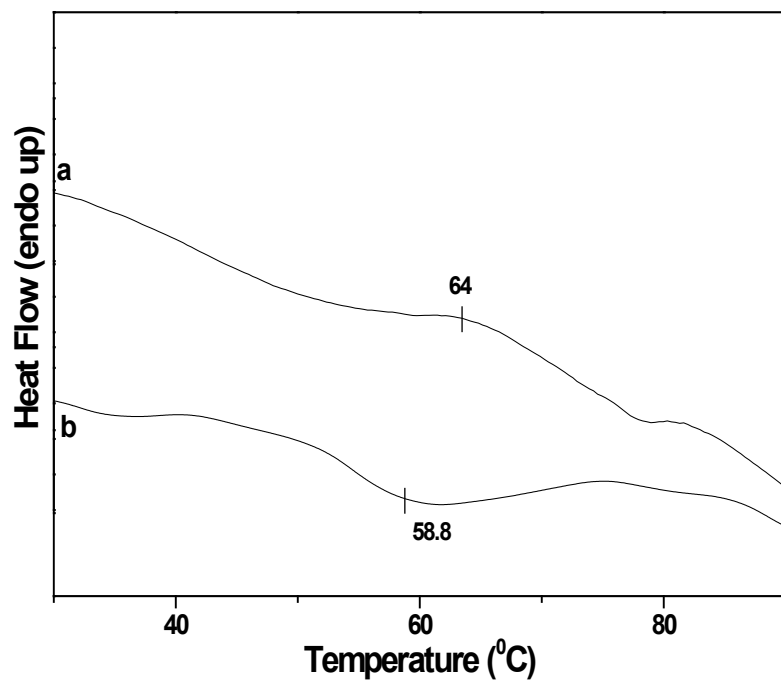

**SI Fig. 4** DSC thermograms of PD solution (0.1%, w/v) (a) heating & (b) cooling

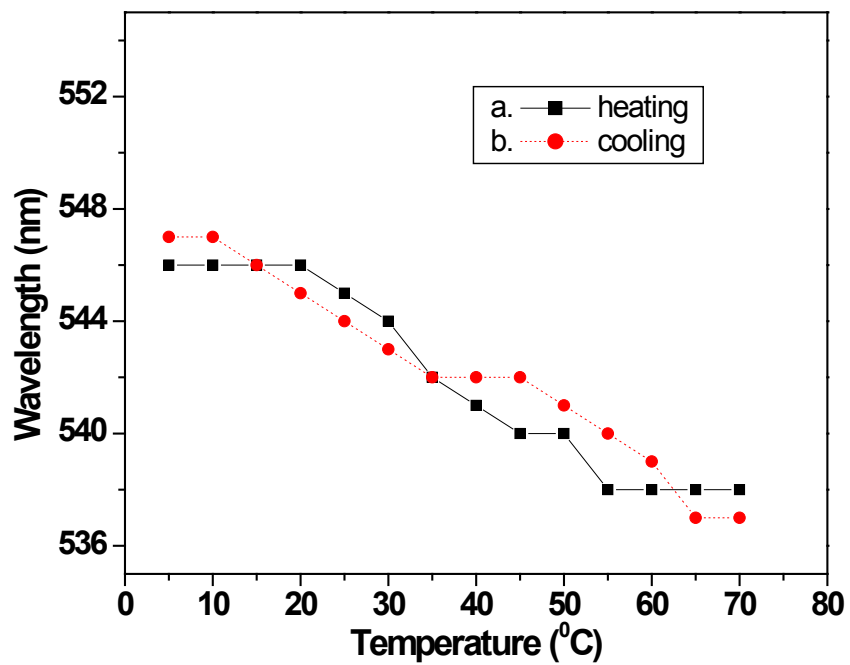

SI Fig. 5 Plots of PL-peak position of PD solution (0.1%, w/v) (a) heating & (b) cooling

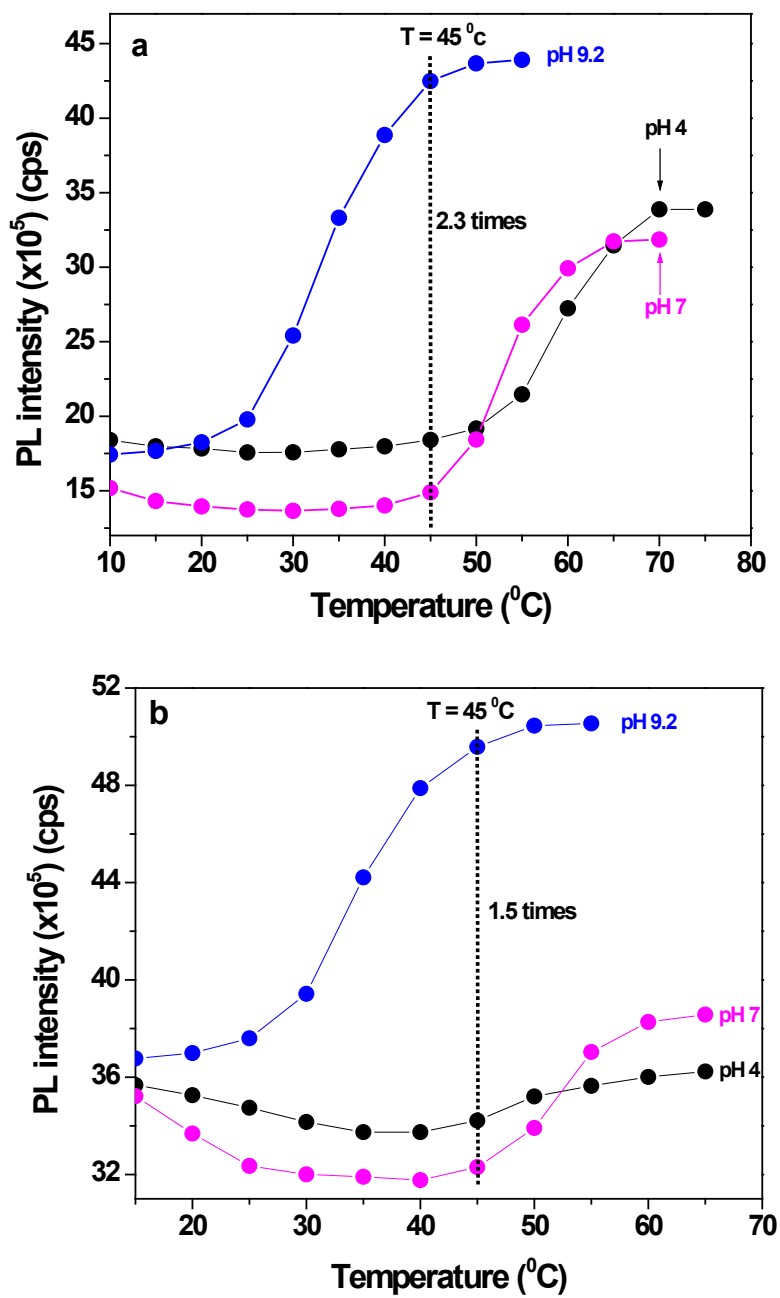

SI Fig. 6 pH dependent PL intensity Vs. temperature plot of PD doped aqueous MC solution (a) for set II and (b) set III.

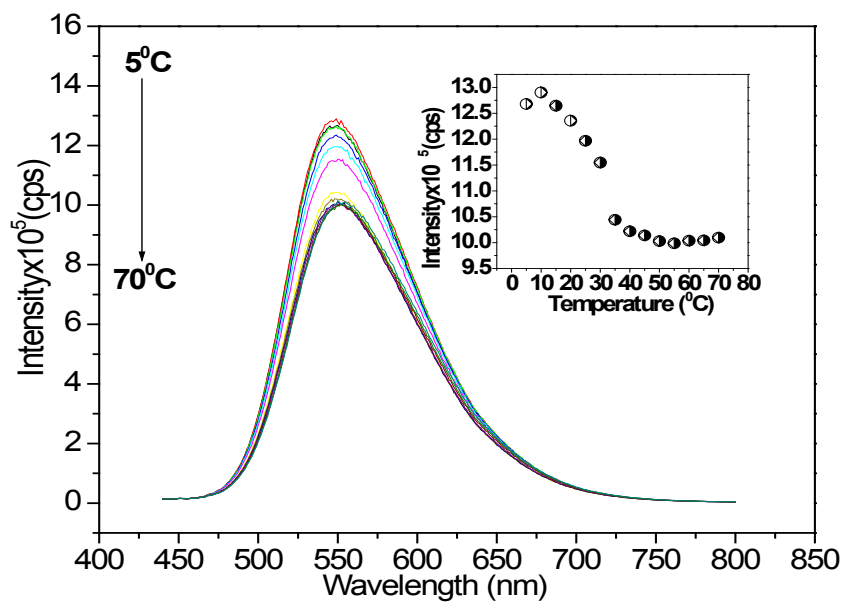

**SI Fig.7a** Temperature dependent PL spectra of 0.1% (w/v) PD graft copolymer at pH 4 **Inset:** Plot of PL intensity Vs. temperature ( $^\circ\text{C}$ ) for heating) process of the same system



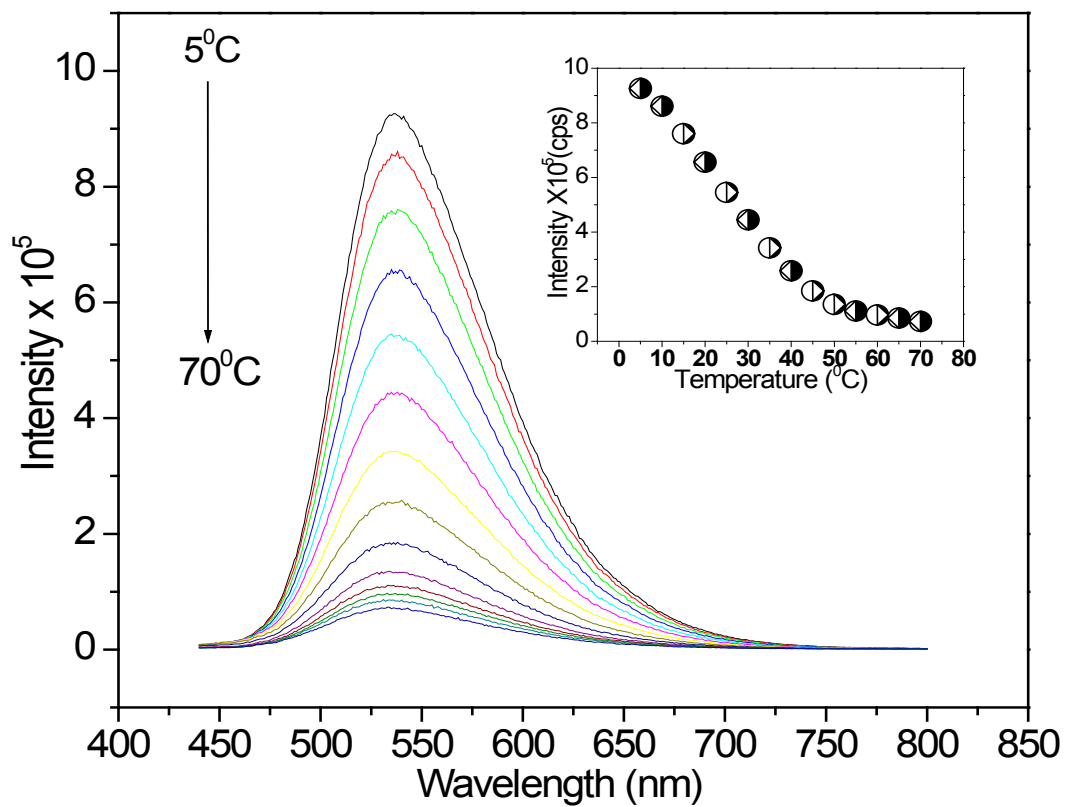

**SI Fig. 7b** Temperature dependent PL spectra of 0.1% (w/v) PD graft copolymer at pH 9.2 **Inset:** Plot of PL intensity Vs. temperature ( $^{\circ}$ C) for heating process of the system
